# Supplementary material for: Systematic review of residual toxicity studies of pesticides to bees and veracity of guidance on pesticide labels
Source: PeerJ. 2024 Jan 3;12:e16672. doi: 10.7717/peerj.16672 (PMC10771081; doi:10.7717/peerj.16672)
Supplement: Supplemental Information 5 [file peerj-12-16672-s005.xls]

## Sheet: Summary of Data
Paper	Formulation	Active Ingredient	Species	Application Rate	Application Rate Units
An Extended Laboratory Contact Toxicity Test to Evaluate the Toxicity of Residues of EXP61685B (10% EC ethiprole) on foliage to the Honeybee, Apis mellifera	EC	ethiprole	Apis mellifera	200	g ai/ha
	unstated	dimethoate	Apis mellifera	300	g ai/ha
Assessment of Toxicity of Fipronil and its Residues to Honey Bees	SC	fipronil	Apis mellifera	125 * 10^-5	g product/whole cotton plant
				625 * 10^-6	g product/whole cotton plant
Bee Research Investigations 1983	EC	chlorpyrifos	Apis mellifera	0.5	lb ai/A
				1	lb ai/A
			Megachile rotundata	0.5	lb ai/A
				1	lb ai/A
			Nomia melanderi	0.5	lb ai/A
				1	lb ai/A
		naled	Apis mellifera	1	lb ai/A
			Megachile rotundata	1	lb ai/A
	SP	acephate	Apis mellifera	0.5	lb ai/A
			Megachile rotundata	0.5	lb ai/A
Bee Research Investigations 1984	EC	bifenthrin	Apis mellifera	0.0125	lb ai/A
				0.025	lb ai/A
				0.05	lb ai/A
				0.1	lb ai/A
			Megachile rotundata	0.0125	lb ai/A
				0.025	lb ai/A
				0.05	lb ai/A
				0.1	lb ai/A
		colpyralid	Apis mellifera	0.05	lb ai/A
				0.1	lb ai/A
				0.2	lb ai/A
			Megachile rotundata	0.05	lb ai/A
				0.1	lb ai/A
				0.2	lb ai/A
		lambda-cyhalothrin	Apis mellifera	0.01	lb ai/A
				0.02	lb ai/A
			Megachile rotundata	0.01	lb ai/A
				0.02	lb ai/A
		methyl parathion	Apis mellifera	0.5	lb ai/A
				1	lb ai/A
			Megachile rotundata	0.5	lb ai/A
				1	lb ai/A
	EW	colpyralid	Apis mellifera	0.05	lb ai/A
				0.1	lb ai/A
				0.2	lb ai/A
			Megachile rotundata	0.05	lb ai/A
				0.1	lb ai/A
				0.2	lb ai/A
	F	clofentezine	Apis mellifera	0.25	lb ai/A
				0.5	lb ai/A
				1	lb ai/A
				2	lb ai/A
			Megachile rotundata	0.25	lb ai/A
				0.5	lb ai/A
				1	lb ai/A
				2	lb ai/A
	WP	permethrin	Apis mellifera	0.05	lb ai/A
				0.1	lb ai/A
			Megachile rotundata	0.05	lb ai/A
				0.1	lb ai/A
Bee Research Investigations 1985	E	cyfluthrin	Apis mellifera	0.025	lb ai/A
				0.05	lb ai/A
			Megachile rotundata	0.025	lb ai/A
				0.05	lb ai/A
	EC	clopyralid	Apis mellifera	0.1	lb ai/A
			Megachile rotundata	0.1	lb ai/A
		diazinon	Apis mellifera	0.05	lb ai/A
				1	lb ai/A
			Megachile rotundata	0.05	lb ai/A
		fenvalerate	Apis mellifera	0.2	lb ai/A
				0.2 + 2 oz	lb ai/A
				0.2 + 8 oz	lb ai/A
		methomyl	Apis mellifera	0.9	lb ai/A
		prochloraz	Apis mellifera	0.5	lb ai/A
				1	lb ai/A
				2	lb ai/A
	EW	clopyralid	Apis mellifera	0.1	lb ai/A
			Megachile rotundata	0.1	lb ai/A
	F	aldoxycarb	Apis mellifera	3	lb ai/A
	WP	cyromazine	Apis mellifera	0.25	lb ai/A
Bee Research Investigations 1986	DF	thiodicarb	Apis mellifera	1	lb ai/A
	E	bifenthrin	Apis mellifera	0.05	lb ai/A
		cypermethrin	Apis mellifera	0.1	lb ai/A
		lambda-cyhalothrin	Apis mellifera	0.03	lb ai/A
		puperonyl butoxide	Apis mellifera	0.5	lb ai/A
	EC	esfenvalerate	Apis mellifera	0.1	lb ai/A
		lindane	Apis mellifera	0.5	lb ai/A
				1	lb ai/A
				1.5	lb ai/A
		malathion	Apis mellifera	1	lb ai/A
		oxamyl	Apis mellifera	1	lb ai/A
	EW	clopyralid	Apis mellifera	0.1	lb ai/A
	FLO	lindane	Apis mellifera	0.5	lb ai/A
				1	lb ai/A
				1.5	lb ai/A
	R	oxydemeton-methyl	Apis mellifera	0.5	lb ai/A
	SP	formetanate hydrochloride	Apis mellifera	1	lb ai/A
		trichlorfon	Apis mellifera	1	lb ai/A
	WP	endosulfan	Apis mellifera	0.5	lb ai/A
		lindane	Apis mellifera	0.5	lb ai/A
				1	lb ai/A
				1.5	lb ai/A
Bee Research Investigations 1987	E	cypermethrin	Apis mellifera	0.1	lb ai/A
		lambda-cyhalothrin	Megachile rotundata	0.03	lb ai/A
	EC	fenvalerate	Megachile rotundata	0.2	lb ai/A
	EW	clopyralid	Megachile rotundata	0.1	lb ai/A
			Nomia melanderi	0.1	lb ai/A
Bee Research Investigations 1988	E	cypermethrin	Apis mellifera	0.1	lb ai/A
Bee Research Investigations, 1971	D	leptophos	Apis mellifera	1	lb ai/A
				2	lb ai/A
	EC	leptophos	Apis mellifera	1	lb ai/A
				2	lb ai/A
			Megachile rotundata	1	lb ai/A
			Nomia melanderi	1	lb ai/A
		methyl parathion	Apis mellifera	0.5	lb ai/A
			Megachile rotundata	0.5	lb ai/A
			Nomia melanderi	0.5	lb ai/A
		pirimiphos-ethyl	Apis mellifera	1	lb ai/A
			Megachile rotundata	1	lb ai/A
		pirimiphos-methyl	Apis mellifera	0.5	lb ai/A
			Megachile rotundata	0.5	lb ai/A
	SP	formetanate hydrochloride	Apis mellifera	0.5	lb ai/A
			Megachile rotundata	0.5	lb ai/A
			Nomia melanderi	0.5	lb ai/A
		trichlorfon	Apis mellifera	1	lb ai/A
			Megachile rotundata	1	lb ai/A
			Nomia melanderi	1	lb ai/A
	WP	acephate	Apis mellifera	1	lb ai/A
			Megachile rotundata	1	lb ai/A
			Nomia melanderi	1	lb ai/A
		methomyl	Apis mellifera	1	lb ai/A
			Megachile rotundata	1	lb ai/A
			Nomia melanderi	1	lb ai/A
		zeta-cypermethrin	Apis mellifera	1	lb ai/A
			Megachile rotundata	1	lb ai/A
			Nomia melanderi	1	lb ai/A
Bee Research Investigations, 1972	EC	dimethoate	Apis mellifera	0.125	lb ai/A
				0.25	lb ai/A
			Megachile rotundata	0.125	lb ai/A
				0.25	lb ai/A
		propargite	Apis mellifera	2.1	lb ai/A
				2.25	lb ai/A
			Megachile rotundata	2.1	lb ai/A
				2.25	lb ai/A
	SP	formetanate hydrochloride	Apis mellifera	0.23	lb ai/A
				0.45	lb ai/A
				0.5	lb ai/A
				1	lb ai/A
			Megachile rotundata	0.23	lb ai/A
				0.45	lb ai/A
				0.5	lb ai/A
				1	lb ai/A
			Nomia melanderi	0.23	lb ai/A
				0.45	lb ai/A
				0.5	lb ai/A
				1	lb ai/A
	ULV	fenthion	Apis mellifera	0.8	oz ai/A
			Megachile rotundata	0.8	oz ai/A
		malathion	Apis mellifera	10	oz ai/A
			Megachile rotundata	10	oz ai/A
Bee Research Investigations, 1973	EC	chlorpyrifos	Apis mellifera	0.25	lb ai/A
				0.5	lb ai/A
				1	lb ai/A
			Megachile rotundata	0.25	lb ai/A
				0.5	lb ai/A
				1	lb ai/A
			Nomia melanderi	0.25	lb ai/A
				0.5	lb ai/A
				1	lb ai/A
		dicofol	Apis mellifera	1.5	lb ai/A
		disulfoton	Apis mellifera	0.5	lb ai/A
				1	lb ai/A
			Megachile rotundata	0.5	lb ai/A
				1	lb ai/A
			Nomia melanderi	0.5	lb ai/A
				1	lb ai/A
		fonofos	Apis mellifera	1	lb ai/A
				2	lb ai/A
		phosmet	Apis mellifera	1	lb ai/A
				2	lb ai/A
	Enc.	fonofos	Apis mellifera	1	lb ai/A
				2	lb ai/A
	LS	methomyl	Apis mellifera	0.25	lb ai/A
				0.5	lb ai/A
				1	lb ai/A
			Megachile rotundata	0.25	lb ai/A
				0.5	lb ai/A
				1	lb ai/A
			Nomia melanderi	0.25	lb ai/A
				0.5	lb ai/A
				1	lb ai/A
		oxamyl	Apis mellifera	0.25	lb ai/A
				0.5	lb ai/A
				1	lb ai/A
			Megachile rotundata	0.25	lb ai/A
				0.5	lb ai/A
				1	lb ai/A
			Nomia melanderi	0.25	lb ai/A
				0.5	lb ai/A
				1	lb ai/A
	SP	formetanate hydrochloride	Apis mellifera	0.5	lb ai/A
				1	lb ai/A
			Megachile rotundata	0.5	lb ai/A
				1	lb ai/A
		trichlorfon	Apis mellifera	1	lb ai/A
			Megachile rotundata	1	lb ai/A
	WP	phosmet	Apis mellifera	1	lb ai/A
				2	lb ai/A
Bee Research Investigations, 1975	EC	dimethoate	Apis mellifera	0.5	lb ai/A
			Megachile rotundata	0.5	lb ai/A
			Nomia melanderi	0.5	lb ai/A
		fenitrothion	Apis mellifera	0.5	lb ai.A
				1	lb ai.A
		fenpropathrin	Apis mellifera	0.1	lb ai.A
				0.4	lb ai.A
			Megachile rotundata	0.1	lb ai.A
				0.4	lb ai.A
			Nomia melanderi	0.1	lb ai.A
				0.4	lb ai.A
		fenvalerate	Apis mellifera	0.1	lb ai.A
				0.4	lb ai.A
			Megachile rotundata	0.1	lb ai.A
				0.4	lb ai.A
			Nomia melanderi	0.1	lb ai.A
				0.4	lb ai.A
		imidacloprid	Apis mellifera	0.25	lb ai/A
				0.5	lb ai/A
			Megachile rotundata	0.25	lb ai/A
				0.5	lb ai/A
			Nomia melanderi	0.25	lb ai/A
				0.5	lb ai/A
		methidathion	Apis mellifera	1	lb ai/A
			Megachile rotundata	1	lb ai/A
			Nomia melanderi	1	lb ai/A
		permethrin	Apis mellifera	0.5	oz ai/A
				1	oz ai/A
				2	oz ai/A
			Megachile rotundata	0.5	oz ai/A
				1	oz ai/A
				2	oz ai/A
			Nomia melanderi	0.5	oz ai/A
				1	oz ai/A
				2	oz ai/A
		profenofos	Apis mellifera	1	lb ai.A
			Megachile rotundata	1	lb ai.A
			Nomia melanderi	1	lb ai.A
	F	carbofuran	Apis mellifera	1	lb ai/A
			Megachile rotundata	1	lb ai/A
			Nomia melanderi	1	lb ai/A
	WP	azamethiphos	Apis mellifera	0.5	lb ai.A
				2	lb ai.A
Bee Research Investigations, 1976	EC	permethrin	Apis mellifera	0.5	oz ai/A
				2	oz ai/A
			Megachile pacifica	0.5	oz ai/A
				2	oz ai/A
			Nomia melanderi	0.5	oz ai/A
				2	oz ai/A
	G	dimethoate	Megachile pacifica	10	lb ai/A
				20	lb ai/A
				40	lb ai/A
Bee Research Investigations, 1977	EC	methyl parathion	Apis mellifera	0.5	lb ai/A
				1	lb ai/A
		permethrin	Apis mellifera	0.05	lb ai/A
				0.1	lb ai/A
				0.2	lb ai/A
			Megachile pacifica	0.05	lb ai/A
				0.1	lb ai/A
				0.2	lb ai/A
			Nomia melanderi	0.05	lb ai/A
				0.1	lb ai/A
				0.2	lb ai/A
	WP	malonoben	Apis mellifera	0.25	lb ai/A
				0.5	lb ai/A
				1	lb ai/A
			Megachile pacifica	0.25	lb ai/A
				0.5	lb ai/A
				1	lb ai/A
			Nomia melanderi	0.25	lb ai/A
				0.5	lb ai/A
				1	lb ai/A
Bee Research Investigations, 1978	EC	fenitrothion	Apis mellifera	0.5	lb ai/A
				1	lb ai/A
			Megachile rotundata	0.5	lb ai/A
				1	lb ai/A
			Nomia melanderi	0.5	lb ai/A
				1	lb ai/A
		malonoben	Megachile rotundata	0.5	lb ai/A
				1	lb ai/A
				2	lb ai/A
			Nomia melanderi	0.5	lb ai/A
				1	lb ai/A
				2	lb ai/A
		naled	Apis mellifera	1	lb ai/A
			Megachile rotundata	1	lb ai/A
			Nomia melanderi	1	lb ai/A
	LS	acephate	Apis mellifera	1	lb ai/A
	SP	acephate	Apis mellifera	1	lb ai/A
	WP	acephate	Apis mellifera	0.5	lb ai/A
				1	lb ai/A
			Megachile rotundata	0.5	lb ai/A
				1	lb ai/A
			Nomia melanderi	0.5	lb ai/A
				1	lb ai/A
Bee Research Investigations, 1979	E	fluvalinate	Apis mellifera	0.1	lb ai/A
	EC	permethrin	Apis mellifera	0.1	lb ai/A
				0.2	lb ai/A
	F	thiodicarb	Apis mellifera	0.5	lb ai/A
				1.2	lb ai/A
Bee Research Investigations, 1987	E	naled	Apis mellifera	1	lb ai/A
		tiazamate	Apis mellifera	0.25	lb ai/A
			Megachile rotundata	0.25	lb ai/A
			Nomia melanderi	0.25	lb ai/A
	EC	cypermethrin	Megachile rotundata	0.06	lb ai/A
		fenpropathrin	Apis mellifera	0.2	lb ai/A
				0.4	lb ai/A
		oxydemeton-methyl	Apis mellifera	0.5	lb ai/A
				0.75	lb ai/A
				1	lb ai/A
			Megachile rotundata	0.5	lb ai/A
				0.75	lb ai/A
				1	lb ai/A
			Nomia melanderi	0.5	lb ai/A
				0.75	lb ai/A
				1	lb ai/A
		permethrin	Megachile rotundata	0.125	lb ai/A
	WP	endosulfan	Megachile rotundata	0.5	lb ai/A
				0.75	lb ai/A
				1	lb ai/A
		methomyl	Apis mellifera	0.9	lb ai/A
			Megachile rotundata	0.9	lb ai/A
			Nomia melanderi	0.9	lb ai/A
BYI 02960 200 SL: A Foliage Residue Toxicity Study with the Honeybee	SL	flupyradifurone	Apis mellifera	205	g ai/ha
Deltamethrin/Honey Bees Toxicity of Residues on Foliage	EC	deltamethrin	Apis mellifera	0.02	lb AI/acre
Differences Between Susceptibility of Four Pollinato Species (Hymenoptera:Apoidea) to Field Weathered Insecticide Residues	E	chlorpyrifos	Apis mellifera	0.84	kg (ai/ha)
				1.68	kg (ai/ha)
			Bombus occidentalis	0.84	kg (ai/ha)
				1.68	kg (ai/ha)
			Megachile rotundata	0.84	kg (ai/ha)
				1.68	kg (ai/ha)
			Nomia melanderi	0.84	kg (ai/ha)
				1.68	kg (ai/ha)
		cyhalothrin	Apis mellifera	0.056	kg (ai/ha)
			Bombus occidentalis	0.056	kg (ai/ha)
			Megachile rotundata	0.056	kg (ai/ha)
			Nomia melanderi	0.056	kg (ai/ha)
		malathion	Apis mellifera	1.12	kg (ai/ha)
			Bombus occidentalis	1.12	kg (ai/ha)
			Megachile rotundata	1.12	kg (ai/ha)
			Nomia melanderi	1.12	kg (ai/ha)
		malathion and methoxychlor	Apis mellifera	1.12	kg (ai/ha)
			Bombus occidentalis	1.12	kg (ai/ha)
			Megachile rotundata	1.12	kg (ai/ha)
			Nomia melanderi	1.12	kg (ai/ha)
		naled	Apis mellifera	1.12	kg (ai/ha)
			Bombus occidentalis	1.12	kg (ai/ha)
			Megachile rotundata	1.12	kg (ai/ha)
			Nomia melanderi	1.12	kg (ai/ha)
	EC	diazinon	Apis mellifera	0.84	kg (ai/ha)
				1.68	kg (ai/ha)
				3.36	kg (ai/ha)
			Bombus occidentalis	0.84	kg (ai/ha)
				1.68	kg (ai/ha)
				3.36	kg (ai/ha)
			Megachile rotundata	0.84	kg (ai/ha)
				1.68	kg (ai/ha)
				3.36	kg (ai/ha)
			Nomia melanderi	0.84	kg (ai/ha)
				1.68	kg (ai/ha)
				3.36	kg (ai/ha)
		dimethoate	Apis mellifera	0.56	kg (ai/ha)
			Bombus occidentalis	0.56	kg (ai/ha)
			Megachile rotundata	0.56	kg (ai/ha)
			Nomia melanderi	0.56	kg (ai/ha)
		endosulfan	Apis mellifera	0.84	kg (ai/ha)
			Bombus occidentalis	0.84	kg (ai/ha)
			Megachile rotundata	0.84	kg (ai/ha)
			Nomia melanderi	0.84	kg (ai/ha)
		esfenvalerate	Apis mellifera	0.056	kg (ai/ha)
			Bombus occidentalis	0.056	kg (ai/ha)
			Megachile rotundata	0.056	kg (ai/ha)
			Nomia melanderi	0.056	kg (ai/ha)
		pyrethrins	Apis mellifera	1.12	kg (ai/ha)
			Bombus occidentalis	1.12	kg (ai/ha)
			Megachile rotundata	1.12	kg (ai/ha)
			Nomia melanderi	1.12	kg (ai/ha)
	EW	zeta-cypermethrin	Apis mellifera	0.041	kg (ai/ha)
			Bombus occidentalis	0.041	kg (ai/ha)
			Megachile rotundata	0.041	kg (ai/ha)
			Nomia melanderi	0.041	kg (ai/ha)
	F	carbaryl	Apis mellifera	3.36	kg (ai/ha)
			Bombus occidentalis	3.36	kg (ai/ha)
			Megachile rotundata	3.36	kg (ai/ha)
			Nomia melanderi	3.36	kg (ai/ha)
	FS	imidacloprid	Apis mellifera	0.168	kg (ai/ha)
			Bombus occidentalis	0.168	kg (ai/ha)
			Megachile rotundata	0.168	kg (ai/ha)
			Nomia melanderi	0.168	kg (ai/ha)
	S	azinphos-methyl	Apis mellifera	1.12	kg (ai/ha)
			Bombus occidentalis	1.12	kg (ai/ha)
			Megachile rotundata	1.12	kg (ai/ha)
			Nomia melanderi	1.12	kg (ai/ha)
	SC	oxydemeton-methyl	Apis mellifera	0.56	kg (ai/ha)
			Bombus occidentalis	0.56	kg (ai/ha)
			Megachile rotundata	0.56	kg (ai/ha)
			Nomia melanderi	0.56	kg (ai/ha)
	SP	acephate	Apis mellifera	1.45	kg (ai/ha)
			Bombus occidentalis	1.45	kg (ai/ha)
			Megachile rotundata	1.45	kg (ai/ha)
			Nomia melanderi	1.45	kg (ai/ha)
	WP	azinphos-methyl	Apis mellifera	1.12	kg (ai/ha)
			Bombus occidentalis	1.12	kg (ai/ha)
			Megachile rotundata	1.12	kg (ai/ha)
			Nomia melanderi	1.12	kg (ai/ha)
Evaluation of persistence of insecticide toxicity in honey bees (Apis mellifera L.)	EC	cypermethrin	Apis mellifera	65	g ai/ha
	SC	fipronil	Apis mellifera	45	g ai/ha
		indoxacarb	Apis mellifera	44	g ai/ha
	SC/EC	dimethoate	Apis mellifera	200	g ai/ha
	SL	imidacloprid	Apis mellifera	20	g ai/ha
	unstated	azadirachtin	Apis mellifera	5 mL/L	g ai/ha
Field and laboratory tests on the effects of cyhalothrin on adults of Apis mellifera, Megachile rotundata, and Nomia melanderi	EC	cyhalothrin	Apis mellifera	0.011	Kg AI/ha
				0.017	Kg AI/ha
				0.022	Kg AI/ha
				0.028	Kg AI/ha
				0.034	Kg AI/ha
			Megachile rotundata	0.011	Kg AI/ha
				0.017	Kg AI/ha
				0.022	Kg AI/ha
				0.028	Kg AI/ha
				0.034	Kg AI/ha
			Nomia melanderi	0.011	Kg AI/ha
				0.017	Kg AI/ha
				0.022	Kg AI/ha
				0.028	Kg AI/ha
				0.034	Kg AI/ha
	EC + unstated	cyhalothrin + adjuvant	Apis mellifera	0.028	Kg AI/ha
			Megachile rotundata	0.028	Kg AI/ha
			Nomia melanderi	0.028	Kg AI/ha
Field and laboratory tests on the effects of fipronil on adult female bees of Apis mellifera, Megachile rotundata and Nomia melanderi	SC	fipronil	Apis mellifera	0.014	Kg AI/ha
				0.028	Kg AI/ha
				0.11	Kg AI/ha
				0.22	Kg AI/ha
			Megachile rotundata	0.014	Kg AI/ha
				0.028	Kg AI/ha
				0.11	Kg AI/ha
				0.22	Kg AI/ha
			Nomia melanderi	0.014	Kg AI/ha
				0.028	Kg AI/ha
				0.11	Kg AI/ha
				0.22	Kg AI/ha
	WG	fipronil	Apis mellifera	0.014	Kg AI/ha
				0.028	Kg AI/ha
				0.11	Kg AI/ha
				0.22	Kg AI/ha
			Megachile rotundata	0.014	Kg AI/ha
				0.028	Kg AI/ha
				0.11	Kg AI/ha
				0.22	Kg AI/ha
			Nomia melanderi	0.014	Kg AI/ha
				0.028	Kg AI/ha
				0.11	Kg AI/ha
				0.22	Kg AI/ha
	WG + unstated	fipronil + adjuvant	Apis mellifera	0.11	Kg AI/ha
				0.22	Kg AI/ha
			Megachile rotundata	0.11	Kg AI/ha
				0.22	Kg AI/ha
			Nomia melanderi	0.11	Kg AI/ha
				0.22	Kg AI/ha
Forced Contact Residual Toxicity of Microencapsulated Methyl Parathion 450 g/l CS to Honey-Bees	CS	methyl parathion	Apis mellifera	450	g ai/ha
Imidacloprid 700 WG: A Foliage Residue Toxicity Study with the Honeybee	WG	imidacloprid	Apis mellifera	50	g ai/ha
				187	g ai/ha
				560	g ai/ha
		imidacloprid + adjuvant	Apis mellifera	50	g ai/ha
				187	g ai/ha
				560	g ai/ha
Impact of pesticide residues on a native bumble nee polinator, Bombus vosnesenskii (Hymenoptera: Apidae)	EC	bifenthrin	Bombus vosnesenskii	0.06	lb/acre
				0.1	lb/acre
				0.2	lb/acre
		oxydemeton-methyl	Bombus vosnesenskii	0.38	lb/acre
				0.5	lb/acre
				1	lb/acre
		spinosad	Bombus vosnesenskii	0.03	lb/acre
				0.1	lb/acre
				0.2	lb/acre
	EW	chlorpyrifos	Bombus vosnesenskii	0.5	lb/acre
				1	lb/acre
				2	lb/acre
	G	pyraclostrobin and boscalid	Bombus vosnesenskii	18.5	oz/acre
				23	oz/acre
				46	oz/acre
	SC	imidacloprid	Bombus vosnesenskii	0.03	lb/acre
				0.04	lb/acre
				0.08	lb/acre
Integrated Pest and Pollinator Investigations	WP	cyromazine	Megachile rotundata	0.33	lb ai/A
			Nomia melanderi	0.33	lb ai/A
		oxytetracycline	Apis mellifera	5.7	oz/acre
				8	oz/acre
			Megachile rotundata	5.7	oz/acre
				8	oz/acre
			Nomia melanderi	5.7	oz/acre
				8	oz/acre
Integrated Pest and Pollinator Investigations 1988	EC	esfenvalerate	Apis mellifera	0.0125	lb ai/A
				0.0375	lb ai/A
				0.05	lb ai/A
				0.075	lb ai/A
				0.1	lb ai/A
			Megachile rotundata	0.0375	lb ai/A
				0.05	lb ai/A
				0.075	lb ai/A
				0.1	lb ai/A
			Nomia melanderi	0.0125	lb ai/A
				0.0375	lb ai/A
Integrated Pest and Pollinator Investigations 1991	EC	chlorypyrifos	Apis mellifera	0.025	lb ai/A
				0.05	lb ai/A
				0.1	lb ai/A
		flucycloxuran	Apis mellifera	0.125	lb ai/A
				0.25	lb ai/A
	FS	imidacloprid	Apis mellifera	0.025	lb ai/A
				0.05	lb ai/A
				0.1	lb ai/A
			Megachile rotundata	0.025	lb ai/A
				0.05	lb ai/A
				0.1	lb ai/A
			Nomia melanderi	0.025	lb ai/A
				0.05	lb ai/A
				0.1	lb ai/A
	WG	fipronil	Apis mellifera	0.025	lb ai/A
				0.1	lb ai/A
				0.2	lb ai/A
			Megachile rotundata	0.012	lb ai/A
				0.025	lb ai/A
				0.1	lb ai/A
			Nomia melanderi	0.012	lb ai/A
				0.025	lb ai/A
				0.1	lb ai/A
Integrated Pest and Pollinator Investigations 1996	E	bifenthrin	Apis mellifera	0.032	lb ai/A
		chlorpyrifos	Apis mellifera	1	lb ai/A
		lambda-cyhalothrin	Apis mellifera	0.02	lb ai/A
	WSP	methomyl	Apis mellifera	0.45	lb ai/A
Integrated Pest and Pollinator Investigations 1999	WP	acetamiprid	Apis mellifera	0.05	lb ai/A
				0.075	lb ai/A
				0.1	lb ai/A
				0.15	lb ai/A
				0.3	lb ai/A
			Megachile rotundata	0.05	lb ai/A
				0.075	lb ai/A
				0.1	lb ai/A
				0.15	lb ai/A
				0.3	lb ai/A
			Nomia melanderi	0.05	lb ai/A
				0.075	lb ai/A
				0.1	lb ai/A
				0.15	lb ai/A
				0.3	lb ai/A
Integrated Pest and Pollinator Investigations 2001	EW	zeta-cypermethrin	Megachile rotundata	1.76	oz ai/A
				2.24	oz ai/A
				2.72	oz ai/A
	SC	indoxacarb	Megachile rotundata	11.3	oz ai/A
	WDG	fluazinam	Apis mellifera	0.135	lb ai/A
			Megachile rotundata	0.135	lb ai/A
Methomyl and Honey Bees	D	methomyl	Apis mellifera	1	lb ai/ac
	LS	methomyl	Apis mellifera	0.225	lb ai/ac
	LS + SP	methomyl + chlordimeform	Apis mellifera	0.225 + 0.24	lb ai/ac
	unstated	methomyl	Apis mellifera	0.45	lb ai/ac
				0.9	lb ai/ac
	WP	methomyl	Apis mellifera	0.9	lb ai/ac
				1	lb ai/ac
	WP + unstated	methomyl + adjuvant	Apis mellifera	0.9 + 4 oz/ac	lb ai/ac (methomyl product)
Pest and Pollinator Management on Alfalfa Seed 2011	EC	bifenthrin	Megachile rotundata	6.4	oz/acre
			Nomia melanderi	6.4	oz/acre
		tolfenpyrad	Megachile rotundata	27	fl oz/acre
			Nomia melanderi	27	fl oz/acre
	SC	sulfoxaflor	Megachile rotundata	3	oz/acre
			Nomia melanderi	3	oz/acre
	unstated	experimental compound	Megachile rotundata	7	fl oz/acre
				14	fl oz/acre
			Nomia melanderi	7	fl oz/acre
				14	fl oz/acre
		flonicamid	Megachile rotundata	2.8	oz/acre
			Nomia melanderi	2.8	oz/acre
Pest and Pollinator Management on Alfalfa Seed 2015	unstated	chlorpyrifos and lambda-cyhalothrin	Megachile rotundata	16	oz/acre
			Nomia melanderi	16	oz/acre
		flonicamid	Megachile rotundata	2.8	oz/acre
			Nomia melanderi	2.8	oz/acre
		flupyridifurone	Megachile rotundata	14	oz/acre
			Nomia melanderi	14	oz/acre
		sulfoxaflor	Megachile rotundata	2.25	oz/acre
			Nomia melanderi	2.25	oz/acre
Pesticides and Bees	ULV	carbaryl	Apis mellifera	0.45	Kg AI/ha
			Megachile rotundata	0.45	Kg AI/ha
		fenthion	Apis mellifera	0.9	Kg AI/ha
			Megachile rotundata	0.9	Kg AI/ha
		malathion	Apis mellifera	0.56	Kg AI/ha
			Megachile rotundata	0.56	Kg AI/ha
		propoxur	Apis mellifera	0.14	Kg AI/ha
			Megachile rotundata	0.14	Kg AI/ha
	unstated	acephate	Apis mellifera	0.45 to 0.9	Kg AI/ha
			Megachile rotundata	0.45 to 0.9	Kg AI/ha
			Nomia melanderi	0.45 to 0.9	Kg AI/ha
		azinphosmethyl	Apis mellifera	0.33	Kg AI/ha
			Megachile rotundata	0.33	Kg AI/ha
		bromophos	Apis mellifera	0.9	Kg AI/ha
			Megachile rotundata	0.9	Kg AI/ha
		bromophos-ethyl	Apis mellifera	0.9	Kg AI/ha
			Megachile rotundata	0.9	Kg AI/ha
		carbaryl	Apis mellifera	0.9	Kg AI/ha
			Megachile rotundata	0.9	Kg AI/ha
			Nomia melanderi	0.9	Kg AI/ha
		carbofuran	Apis mellifera	0.9	Kg AI/ha
			Megachile rotundata	0.9	Kg AI/ha
			Nomia melanderi	0.9	Kg AI/ha
		carbophenothion	Apis mellifera	0.9	Kg AI/ha
			Megachile rotundata	0.9	Kg AI/ha
			Nomia melanderi	0.9	Kg AI/ha
		carbosulfan	Apis mellifera	0.45	Kg AI/ha
			Megachile rotundata	0.45	Kg AI/ha
		chlordimeform	Apis mellifera	0.9	Kg AI/ha
			Megachile rotundata	0.9	Kg AI/ha
			Nomia melanderi	0.9	Kg AI/ha
		chlorpyrifos	Apis mellifera	0.9	Kg AI/ha
			Megachile rotundata	0.9	Kg AI/ha
			Nomia melanderi	0.9	Kg AI/ha
		cypermethrin	Apis mellifera	0.07	Kg AI/ha
			Megachile rotundata	0.07	Kg AI/ha
		DDT	Apis mellifera	1.8	Kg AI/ha
			Megachile rotundata	1.8	Kg AI/ha
		demeton	Apis mellifera	0.2	Kg AI/ha
			Megachile rotundata	0.2	Kg AI/ha
			Nomia melanderi	0.2	Kg AI/ha
		diazinon	Apis mellifera	0.9	Kg AI/ha
			Megachile rotundata	0.9	Kg AI/ha
			Nomia melanderi	0.9	Kg AI/ha
		dicofol	Apis mellifera	0.9	Kg AI/ha
			Megachile rotundata	0.9	Kg AI/ha
		dicrotophos	Apis mellifera	0.45	Kg AI/ha
			Megachile rotundata	0.45	Kg AI/ha
			Nomia melanderi	0.45	Kg AI/ha
		diflubenzuron	Apis mellifera	0.1	Kg AI/ha
			Megachile rotundata	0.1	Kg AI/ha
			Nomia melanderi	0.1	Kg AI/ha
		dimethoate	Apis mellifera	0.45	Kg AI/ha
			Megachile rotundata	0.45	Kg AI/ha
			Nomia melanderi	0.45	Kg AI/ha
		dioxathion	Apis mellifera	0.9	Kg AI/ha
			Megachile rotundata	0.9	Kg AI/ha
		disulfoton	Apis mellifera	0.45	Kg AI/ha
			Megachile rotundata	0.45	Kg AI/ha
			Nomia melanderi	0.45	Kg AI/ha
		endosulfan	Apis mellifera	0.45	Kg AI/ha
			Megachile rotundata	0.45	Kg AI/ha
			Nomia melanderi	0.45	Kg AI/ha
		endrin	Apis mellifera	0.9	Kg AI/ha
			Megachile rotundata	0.9	Kg AI/ha
			Nomia melanderi	0.9	Kg AI/ha
		ethion	Apis mellifera	0.9	Kg AI/ha
			Megachile rotundata	0.9	Kg AI/ha
		etrimfos	Apis mellifera	0.45	Kg AI/ha
			Megachile rotundata	0.45	Kg AI/ha
			Nomia melanderi	0.45	Kg AI/ha
		fenvalerate	Apis mellifera	0.9	Kg AI/ha
			Megachile rotundata	0.9	Kg AI/ha
			Nomia melanderi	0.9	Kg AI/ha
		fluvalinate	Apis mellifera	0.9	Kg AI/ha
			Megachile rotundata	0.9	Kg AI/ha
			Nomia melanderi	0.9	Kg AI/ha
		formetanate hydrochloride	Apis mellifera	0.9	Kg AI/ha
			Megachile rotundata	0.9	Kg AI/ha
			Nomia melanderi	0.9	Kg AI/ha
		isofenphos	Apis mellifera	0.9	Kg AI/ha
			Megachile rotundata	0.9	Kg AI/ha
			Nomia melanderi	0.9	Kg AI/ha
		isopropyl parathion	Apis mellifera	0.45	Kg AI/ha
			Megachile rotundata	0.45	Kg AI/ha
			Nomia melanderi	0.45	Kg AI/ha
		leptophos	Apis mellifera	0.9	Kg AI/ha
			Megachile rotundata	0.9	Kg AI/ha
			Nomia melanderi	0.9	Kg AI/ha
		malathion	Apis mellifera	0.9	Kg AI/ha
			Megachile rotundata	0.9	Kg AI/ha
		menazon	Apis mellifera	0.9	Kg AI/ha
			Megachile rotundata	0.9	Kg AI/ha
		methamidophos	Apis mellifera	0.9	Kg AI/ha
			Megachile rotundata	0.9	Kg AI/ha
			Nomia melanderi	0.9	Kg AI/ha
		methidathion	Apis mellifera	0.9	Kg AI/ha
			Megachile rotundata	0.9	Kg AI/ha
			Nomia melanderi	0.9	Kg AI/ha
		methomyl	Apis mellifera	0.4	Kg AI/ha
			Megachile rotundata	0.4	Kg AI/ha
			Nomia melanderi	0.4	Kg AI/ha
		methoxychlor	Apis mellifera	2.7	Kg AI/ha
			Megachile rotundata	2.7	Kg AI/ha
			Nomia melanderi	2.7	Kg AI/ha
		methyl parathion	Apis mellifera	0.45	Kg AI/ha
			Megachile rotundata	0.45	Kg AI/ha
			Nomia melanderi	0.45	Kg AI/ha
		mevinphos	Apis mellifera	0.45	Kg AI/ha
			Megachile rotundata	0.45	Kg AI/ha
			Nomia melanderi	0.45	Kg AI/ha
		monochrotophos	Apis mellifera	0.45	Kg AI/ha
			Megachile rotundata	0.45	Kg AI/ha
			Nomia melanderi	0.45	Kg AI/ha
		naled	Apis mellifera	0.9	Kg AI/ha
			Megachile rotundata	0.9	Kg AI/ha
			Nomia melanderi	0.9	Kg AI/ha
		oxamyl	Apis mellifera	0.9	Kg AI/ha
			Megachile rotundata	0.9	Kg AI/ha
			Nomia melanderi	0.9	Kg AI/ha
		oxydemetonmethyl	Apis mellifera	0.45	Kg AI/ha
			Megachile rotundata	0.45	Kg AI/ha
			Nomia melanderi	0.45	Kg AI/ha
		parathion	Apis mellifera	0.45	Kg AI/ha
			Megachile rotundata	0.45	Kg AI/ha
			Nomia melanderi	0.45	Kg AI/ha
		permethrin	Apis mellifera	0.9	Kg AI/ha
			Megachile rotundata	0.9	Kg AI/ha
			Nomia melanderi	0.9	Kg AI/ha
		phenthoate	Apis mellifera	0.9	Kg AI/ha
			Megachile rotundata	0.9	Kg AI/ha
			Nomia melanderi	0.9	Kg AI/ha
		phosalone	Apis mellifera	1.34	Kg AI/ha
			Megachile rotundata	1.34	Kg AI/ha
			Nomia melanderi	1.34	Kg AI/ha
		phosmet	Apis mellifera	0.9	Kg AI/ha
			Megachile rotundata	0.9	Kg AI/ha
			Nomia melanderi	0.9	Kg AI/ha
		phosphamidon	Apis mellifera	0.45	Kg AI/ha
			Megachile rotundata	0.45	Kg AI/ha
			Nomia melanderi	0.45	Kg AI/ha
		phostex	Apis mellifera	0.9	Kg AI/ha
			Megachile rotundata	0.9	Kg AI/ha
		phoxim	Apis mellifera	1.34	Kg AI/ha
			Megachile rotundata	1.34	Kg AI/ha
			Nomia melanderi	1.34	Kg AI/ha
		pirimicarb	Apis mellifera	0.2	Kg AI/ha
			Megachile rotundata	0.2	Kg AI/ha
			Nomia melanderi	0.2	Kg AI/ha
		pirimiphos-ethyl	Apis mellifera	0.9	Kg AI/ha
			Megachile rotundata	0.9	Kg AI/ha
		pirimiphos-methyl	Apis mellifera	0.45	Kg AI/ha
			Megachile rotundata	0.45	Kg AI/ha
		profenofos	Apis mellifera	0.9	Kg AI/ha
			Megachile rotundata	0.9	Kg AI/ha
			Nomia melanderi	0.9	Kg AI/ha
		propargite	Apis mellifera	1.3 to 1.8	Kg AI/ha
			Megachile rotundata	1.3 to 1.8	Kg AI/ha
			Nomia melanderi	1.3 to 1.8	Kg AI/ha
		ronnel	Apis mellifera	0.9	Kg AI/ha
			Megachile rotundata	0.9	Kg AI/ha
		schradan	Apis mellifera	0.9	Kg AI/ha
			Megachile rotundata	0.9	Kg AI/ha
			Nomia melanderi	0.9	Kg AI/ha
		temephos	Apis mellifera	0.5	Kg AI/ha
			Megachile rotundata	0.5	Kg AI/ha
			Nomia melanderi	0.5	Kg AI/ha
		TEPP	Apis mellifera	0.45	Kg AI/ha
			Megachile rotundata	0.45	Kg AI/ha
			Nomia melanderi	0.45	Kg AI/ha
		tetrachlorvinphos	Apis mellifera	0.9	Kg AI/ha
			Megachile rotundata	0.9	Kg AI/ha
			Nomia melanderi	0.9	Kg AI/ha
		tetradifon	Apis mellifera	0.7	Kg AI/ha
			Megachile rotundata	0.7	Kg AI/ha
			Nomia melanderi	0.7	Kg AI/ha
		thiodicarb	Apis mellifera	0.9	Kg AI/ha
			Megachile rotundata	0.9	Kg AI/ha
		toxaphene	Apis mellifera	2.7	Kg AI/ha
			Megachile rotundata	2.7	Kg AI/ha
			Nomia melanderi	2.7	Kg AI/ha
		toxaphene +/and DDT	Apis mellifera	1.3+2.7	Kg AI/ha
			Megachile rotundata	1.3+2.7	Kg AI/ha
			Nomia melanderi	1.3+2.7	Kg AI/ha
		trichlorfon	Apis mellifera	0.9	Kg AI/ha
			Megachile rotundata	0.9	Kg AI/ha
			Nomia melanderi	0.9	Kg AI/ha
Residual Life and Toxicity to Honey Bees (Hymenoptera: Apidae) of Selected Pyrethroid Formulations Applied to Cotton in Arizona	EC	bifenthrin	Apis mellifera	0.067	Kg AI/ha
		cypermethrin	Apis mellifera	0.09	Kg AI/ha
		fluvalinate	Apis mellifera	0.067	Kg AI/ha
		permethrin	Apis mellifera	0.11	Kg AI/ha
	ULV	bifenthrin	Apis mellifera	0.067	Kg AI/ha
		cypermethrin	Apis mellifera	0.09	Kg AI/ha
		fluvalinate	Apis mellifera	0.067	Kg AI/ha
		permethrin	Apis mellifera	0.11	Kg AI/ha
	WP	permethrin	Apis mellifera	0.11	Kg AI/ha
Residual toxicity to the honeybee (Apis mellifera) of EXP61846A (Ethiprole 10% SC) applied as a foliar spray to tomato plants. An Extended Laboratory Study	SC	ethiprole	Apis mellifera	333	g ai/ha
Studies on Alkali Bees and Pollinator Pesticide Safety in Washington State	EC	bifenthrin	Megachile rotundata	6.4	oz/acre
			Nomia melanderi	6.4	oz/acre
	SC	sulfloxaflor	Megachile rotundata	3	oz/acre
			Nomia melanderi	3	oz/acre
	unstated	flonicamid	Megachile rotundata	2.8	oz/acre
			Nomia melanderi	2.8	oz/acre
		flupyradifurone	Megachile rotundata	7	fl oz/acre
				14	fl oz/acre
			Nomia melanderi	7	fl oz/acre
				14	fl oz/acre
Studies on alkali bees and pollinator pesticide safety in Washington State	EC	bifenthrin	Megachile rotundata	6.4	oz/acre
			Nomia melanderi	6.4	oz/acre
	SC	sulfoxaflor	Megachile rotundata	3	oz/acre
			Nomia melanderi	3	oz/acre
	unstated	flonicamid	Megachile rotundata	2.8	oz/acre
			Nomia melanderi	2.8	oz/acre
		flupyradifurone	Megachile rotundata	7	fl oz/acre
				14	fl oz/acre
			Nomia melanderi	7	fl oz/acre
				14	fl oz/acre
Susceptibility of four bee species (Hymenoptera:Apoidea) to field weathered insecticide residues	AF	thiocarb	Apis mellifera	1.1	kg ai/h
			Bombus occidentalis	1.1	kg ai/h
			Megachile rotundata	1.1	kg ai/h
			Nomia melanderi	1.1	kg ai/h
	E	cypermethrin	Apis mellifera	0.055	kg ai/h
			Bombus occidentalis	0.055	kg ai/h
			Megachile rotundata	0.055	kg ai/h
			Nomia melanderi	0.055	kg ai/h
		methidathion	Apis mellifera	0.825	kg ai/h
			Bombus occidentalis	0.825	kg ai/h
			Megachile rotundata	0.825	kg ai/h
			Nomia melanderi	0.825	kg ai/h
		permethrin	Apis mellifera	0.055	kg ai/h
			Bombus occidentalis	0.055	kg ai/h
			Megachile rotundata	0.055	kg ai/h
			Nomia melanderi	0.055	kg ai/h
	EC	deltamethrin	Apis mellifera	0.209	kg ai/h
			Bombus occidentalis	0.209	kg ai/h
			Megachile rotundata	0.209	kg ai/h
			Nomia melanderi	0.209	kg ai/h
		fenpropathrin	Apis mellifera	0.22	kg ai/h
			Bombus occidentalis	0.22	kg ai/h
			Megachile rotundata	0.22	kg ai/h
			Nomia melanderi	0.22	kg ai/h
		methamidophos	Apis mellifera	0.75	kg ai/h
			Bombus occidentalis	0.75	kg ai/h
			Megachile rotundata	0.75	kg ai/h
			Nomia melanderi	0.75	kg ai/h
	F	carbofuran	Apis mellifera	0.275	kg ai/h
			Bombus occidentalis	0.275	kg ai/h
			Megachile rotundata	0.275	kg ai/h
			Nomia melanderi	0.275	kg ai/h
		methyl parathion	Apis mellifera	0.55	kg ai/h
			Bombus occidentalis	0.55	kg ai/h
			Megachile rotundata	0.55	kg ai/h
			Nomia melanderi	0.55	kg ai/h
	L	oxamyl	Apis mellifera	1.1	kg ai/h
			Bombus occidentalis	1.1	kg ai/h
			Megachile rotundata	1.1	kg ai/h
			Nomia melanderi	1.1	kg ai/h
	SP	formetanate hydrochloride	Apis mellifera	1.1	kg ai/h
			Bombus occidentalis	1.1	kg ai/h
			Megachile rotundata	1.1	kg ai/h
			Nomia melanderi	1.1	kg ai/h
		trichlorfon	Apis mellifera	1.1	kg ai/h
			Bombus occidentalis	1.1	kg ai/h
			Megachile rotundata	1.1	kg ai/h
			Nomia melanderi	1.1	kg ai/h
	WP	phosmet	Apis mellifera	1.1	kg ai/h
			Bombus occidentalis	1.1	kg ai/h
			Megachile rotundata	1.1	kg ai/h
			Nomia melanderi	1.1	kg ai/h
		pyridaben	Apis mellifera	0.44	kg ai/h
			Bombus occidentalis	0.44	kg ai/h
			Megachile rotundata	0.44	kg ai/h
			Nomia melanderi	0.44	kg ai/h
Tetraniliprole: A Foliage Residue Toxicity Study with the Honeybee	SC	tetraniliprole	Apis mellifera	30	g ai/ha
				60	g ai/ha
				100	g ai/ha
The effects of spinosad insecticide to adults of Apis mellifera, Megachile rotundata and Nomia melanderi (Hymenoptera: Apidae)	SC	spinosad	Apis mellifera	0.05	Kg AI/ha
				0.1	Kg AI/ha
				0.2	Kg AI/ha
			Megachile rotundata	0.05	Kg AI/ha
				0.1	Kg AI/ha
				0.2	Kg AI/ha
			Nomia melanderi	0.05	Kg AI/ha
				0.1	Kg AI/ha
				0.2	Kg AI/ha
	SC + unstated	spinosad + adjuvant	Apis mellifera	0.1	Kg AI/ha
			Megachile rotundata	0.1	Kg AI/ha
			Nomia melanderi	0.1	Kg AI/ha
	WDG	spinosad	Apis mellifera	0.05	Kg AI/ha
				0.1	Kg AI/ha
				0.2	Kg AI/ha
			Megachile rotundata	0.05	Kg AI/ha
				0.1	Kg AI/ha
				0.2	Kg AI/ha
			Nomia melanderi	0.05	Kg AI/ha
				0.1	Kg AI/ha
				0.2	Kg AI/ha
	WP	spinosad	Apis mellifera	0.05	Kg AI/ha
				0.1	Kg AI/ha
				0.2	Kg AI/ha
			Megachile rotundata	0.05	Kg AI/ha
				0.1	Kg AI/ha
				0.2	Kg AI/ha
			Nomia melanderi	0.05	Kg AI/ha
				0.1	Kg AI/ha
				0.2	Kg AI/ha
The residual contact toxicity to honey bees of insecticides sprayed on to white clover (trifolium repens l.) in the laboratory	EC	DDT	Apis mellifera	0.25	lb ai/ac
				0.5	lb ai/ac
				1	lb ai/ac
		demeton-O-methyl	Apis mellifera	0.095	lb ai/ac
				0.19	lb ai/ac
				0.38	lb ai/ac
		endosulfan	Apis mellifera	0.1925	lb ai/ac
				0.385	lb ai/ac
				0.77	lb ai/ac
		malathion	Apis mellifera	0.15625	lb ai/ac
				0.3125	lb ai/ac
				0.625	lb ai/ac
				1.25	lb ai/ac
		oxydemeton-methyl	Apis mellifera	0.095	lb ai/ac
				0.19	lb ai/ac
				0.38	lb ai/ac
		phenthoate	Apis mellifera	0.15625	lb ai/ac
				0.3125	lb ai/ac
				0.625	lb ai/ac
				1.25	lb ai/ac
		vamidothion	Apis mellifera	0.125	lb ai/ac
				0.25	lb ai/ac
				0.5	lb ai/ac
	SP	trichlorfon	Apis mellifera	0.3	lb ai/ac
				0.6	lb ai/ac
				1.2	lb ai/ac
	WP	carbaryl	Apis mellifera	0.25	lb ai/ac
				0.5	lb ai/ac
				1	lb ai/ac
				2	lb ai/ac
		DDT	Apis mellifera	0.125	lb ai/ac
				0.25	lb ai/ac
				0.5	lb ai/ac
				1	lb ai/ac
		diazinon	Apis mellifera	0.125	lb ai/ac
				0.25	lb ai/ac
				0.5	lb ai/ac
				1	lb ai/ac
		malathion	Apis mellifera	0.15625	lb ai/ac
				0.3125	lb ai/ac
				0.625	lb ai/ac
				1.25	lb ai/ac
Toxicity of Field-Weathered Insecticide Residues to Four Kinds of Bees	EC	demeton	Apis mellifera	0.5	lb/ac
			Megachile rotundata	0.5	lb/ac
			Nomia melanderi	0.5	lb/ac
		dicofol	Apis mellifera	1	lb/ac
			Megachile rotundata	1	lb/ac
			Nomia melanderi	1	lb/ac
		dicrotophos	Apis mellifera	0.5	lb/ac
			Megachile rotundata	0.5	lb/ac
			Nomia melanderi	0.5	lb/ac
		dimethoate	Apis mellifera	0.5	lb/ac
			Megachile rotundata	0.5	lb/ac
			Nomia melanderi	0.5	lb/ac
		endosulfan	Apis mellifera	1	lb/ac
			Megachile rotundata	1	lb/ac
			Nomia melanderi	1	lb/ac
		isopropyl parathion	Apis mellifera	1	lb/ac
			Megachile rotundata	1	lb/ac
			Nomia melanderi	1	lb/ac
		leptophos	Apis mellifera	1	lb/ac
			Bombus rufocinctus	1	lb/ac
			Megachile rotundata	1	lb/ac
			Nomia melanderi	1	lb/ac
		malathion	Apis mellifera	1	lb/ac
			Megachile rotundata	1	lb/ac
			Nomia melanderi	1	lb/ac
		methyl parathion	Apis mellifera	0.5	lb/ac
			Megachile rotundata	0.5	lb/ac
			Nomia melanderi	0.5	lb/ac
		naled	Apis mellifera	0.5	lb/ac
			Megachile rotundata	0.5	lb/ac
			Nomia melanderi	0.5	lb/ac
		parathion	Apis mellifera	0.5	lb/ac
			Bombus centralis	0.5	lb/ac
			Megachile rotundata	0.5	lb/ac
			Nomia melanderi	0.5	lb/ac
		phosalone	Apis mellifera	1.5	lb/ac
			Megachile rotundata	1.5	lb/ac
			Nomia melanderi	1.5	lb/ac
		phosphamidon	Apis mellifera	0.5	lb/ac
			Megachile rotundata	0.5	lb/ac
			Nomia melanderi	0.5	lb/ac
		propargite	Apis mellifera	1.5	lb/ac
			Megachile rotundata	1.5	lb/ac
			Nomia melanderi	1.5	lb/ac
		temephos + chevron 100	Apis mellifera	0.5	lb/ac
			Megachile rotundata	0.5	lb/ac
			Nomia melanderi	0.5	lb/ac
		tetrachlorvinphos	Apis mellifera	1	lb/ac
			Megachile rotundata	1	lb/ac
			Nomia melanderi	1	lb/ac
		tetradifon	Apis mellifera	0.75	lb/ac
			Megachile rotundata	0.75	lb/ac
			Nomia melanderi	0.75	lb/ac
	EC + EC	DDT + toxaphene	Apis mellifera	1.5 + 3.0	lb/ac
				1.5 +3.0	lb/ac
			Bombus centralis	1.5 + 3.0	lb/ac
			Megachile rotundata	1.5 + 3.0	lb/ac
				1.5 +3.0	lb/ac
			Nomia melanderi	1.5 + 3.0	lb/ac
				1.5 +3.0	lb/ac
	FP	carbophenothion	Apis mellifera	1.5	lb/ac
			Megachile rotundata	1.5	lb/ac
			Nomia melanderi	1.5	lb/ac
	LS	schradan	Apis mellifera	1	lb/ac
			Megachile rotundata	1	lb/ac
			Nomia melanderi	1	lb/ac
	SP	chlordimeform	Apis mellifera	1	lb/ac
			Megachile rotundata	1	lb/ac
			Nomia melanderi	1	lb/ac
		formetanate hydrochloride	Apis mellifera	0.5	lb/ac
			Bombus rufocinctus	0.5	lb/ac
			Megachile rotundata	0.5	lb/ac
			Nomia melanderi	0.5	lb/ac
		trichlorfon	Apis mellifera	1	lb/ac
			Bombus centralis	1	lb/ac
			Megachile rotundata	1	lb/ac
			Nomia melanderi	1	lb/ac
	WP	acephate	Apis mellifera	1	lb/ac
			Bombus rufocinctus	1	lb/ac
			Megachile rotundata	1	lb/ac
			Nomia melanderi	1	lb/ac
		carbaryl	Apis mellifera	1	lb/ac
			Bombus centralis	1	lb/ac
			Megachile rotundata	1	lb/ac
			Nomia melanderi	1	lb/ac
		methomyl	Apis mellifera	0.5	lb/ac
				1	lb/ac
			Bombus rufocinctus	0.5	lb/ac
			Megachile rotundata	0.5	lb/ac
				1	lb/ac
			Nomia melanderi	0.5	lb/ac
				1	lb/ac
		phosmet	Apis mellifera	1	lb/ac
			Megachile rotundata	1	lb/ac
			Nomia melanderi	1	lb/ac
Toxicity of YRC 2894 Treated Foliage to Honey Bees	SC	thiacloprid	Apis mellifera	50	gm AI/ha
				100	gm AI/ha
				200	gm AI/ha
